# Supplementary material for: Double-click synthesis of polysiloxane third-order nonlinear optical polymers with donor–acceptor chromophores
Source: Royal Society of Chemistry journal article supplement (doi:10.1039/c9py01771b), 2020-01-01
Supplement: c9py01771b1.pdf [file c9py01771b1.pdf]

### Supplementary Information

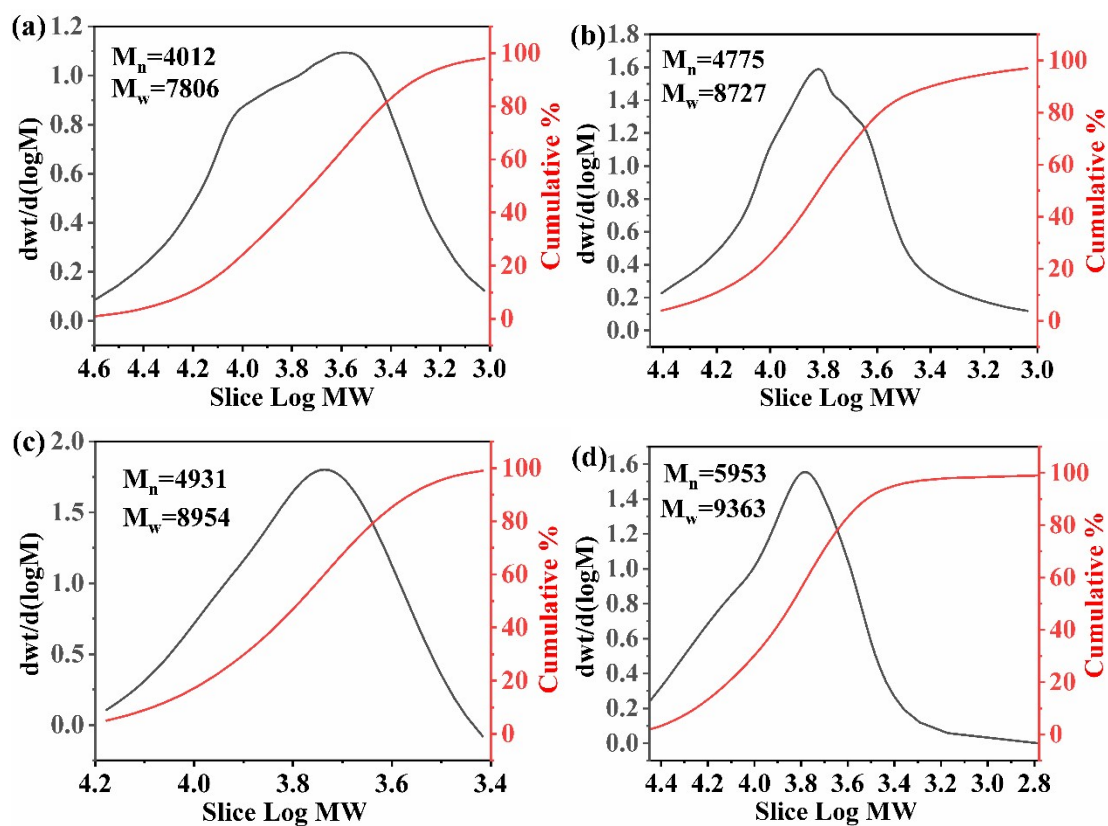

Fig. S1 GPC diagrams of p1(a), p2(b), p3(c) and p4(d)

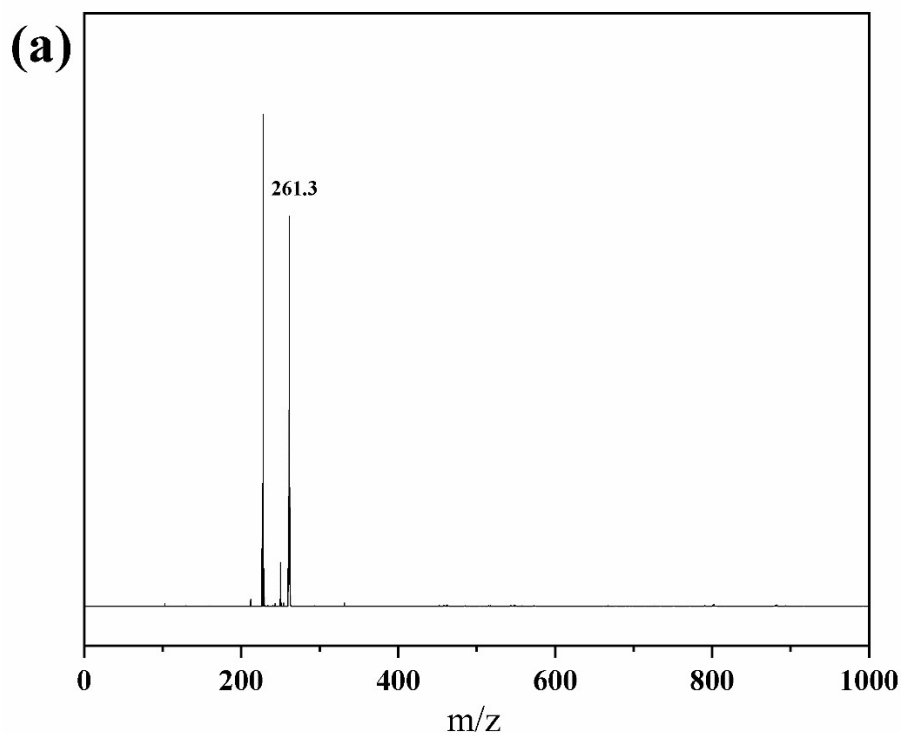

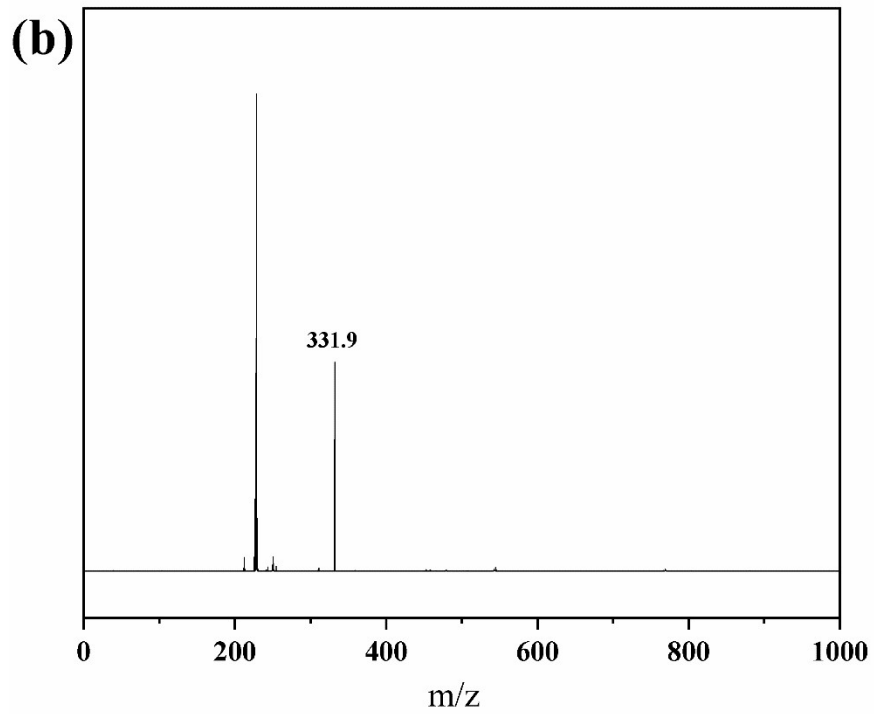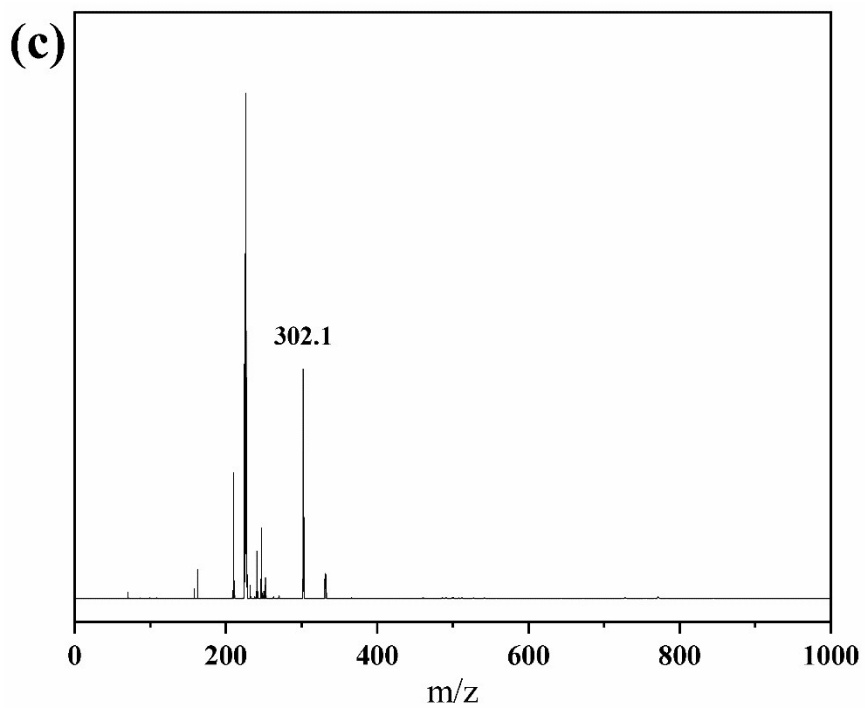

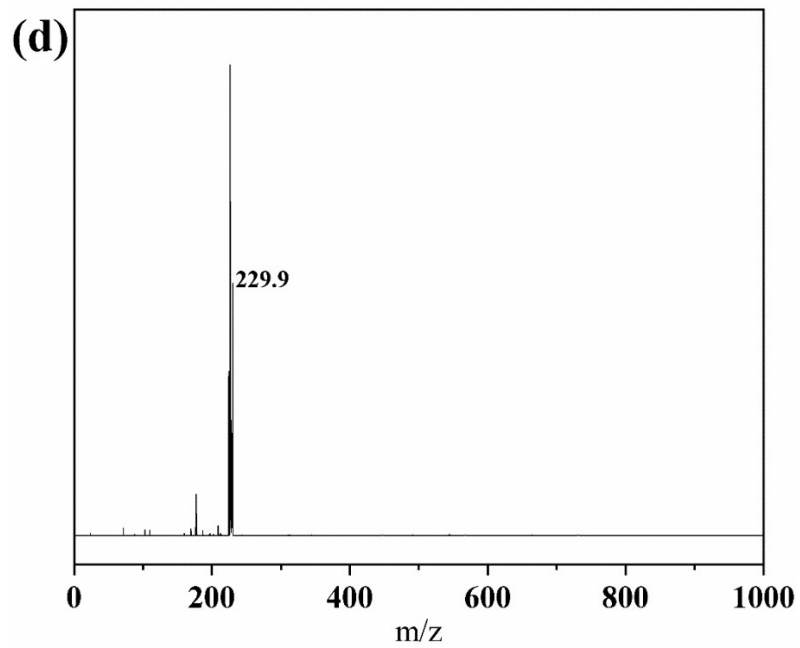

**Fig. S2** MALDI-TOF-MS spectra of **A1(a)**, **A3(b)**, **A4(c)** and **A5(d)** (\*226.3 is the peak of matrix dithranol)
